# Supplementary material for: Iron oxide nanozyme suppresses intracellular Salmonella Enteritidis growth and alleviates infection in vivo
Source: PubMed Central journal article supplement — Theranostics. 2018 Nov 29;8(22):6149–62. doi: 10.7150/thno.29303 (PMC6299686; doi:10.7150/thno.29303), 2018-11-29
Supplement: thnov08p6149s1.pdf [file thnov08p6149s1.pdf]

1 Supporting Information

2 **Iron oxide nanozyme suppresses intracellular *Salmonella***  
3 **enteritidis growth and alleviates infection *in vivo***

4 Shourong Shi<sup>1,5,6</sup>✉, Shu Wu<sup>1,2</sup>, Yiru Shen<sup>1</sup>, Shan Zhang<sup>1</sup>, Yunqi Xiao<sup>1</sup>, Xi He<sup>2</sup>, Jiansen Gong<sup>1</sup>,  
5 Yuhua Farnell<sup>4</sup>, Yan Tang<sup>3</sup>, Yixin Huang<sup>3</sup> and Lizeng Gao<sup>3</sup>✉

6 <sup>1</sup>Department of Feed and Nutrition, Poultry Institute, Chinese Academy of Agricultural  
7 Sciences,

8 Yangzhou, Jiangsu 225125, China

9 <sup>2</sup>College of Animal Science and Technology, Hunan Agricultural University, Changsha,  
10 Hunan 410128, China

11 <sup>3</sup>Jiangsu Key Laboratory of Experimental & Translational Non-coding RNA Research,  
12 Institute of Translational Medicine , School of Medicine, Yangzhou University, Yangzhou,  
13 Jiangsu 225000, China

14 <sup>4</sup>Department of Poultry Science, Texas A&M AgriLife Research, Texas A&M University,  
15 College Station, TX 77843, USA

16 <sup>5</sup>Institute of Effective Evaluation of Feed and Feed Additive (Poultry institute), Ministry of  
17 Agriculture, Yangzhou, Jiangsu 225125, China

18 <sup>6</sup>Jiangsu Co-Innovation Center for Prevention and Control of Important Animal Infectious  
19 Diseases and Zoonoses, Yangzhou University, Yangzhou, Jiangsu 225000, China

20 **Corresponding Authors**

21 ✉ Email: [ssr236@163.com](mailto:ssr236@163.com) (Shourong Shi), Email: [lzgao@yzu.edu.cn](mailto:lzgao@yzu.edu.cn) (Lizeng Gao)

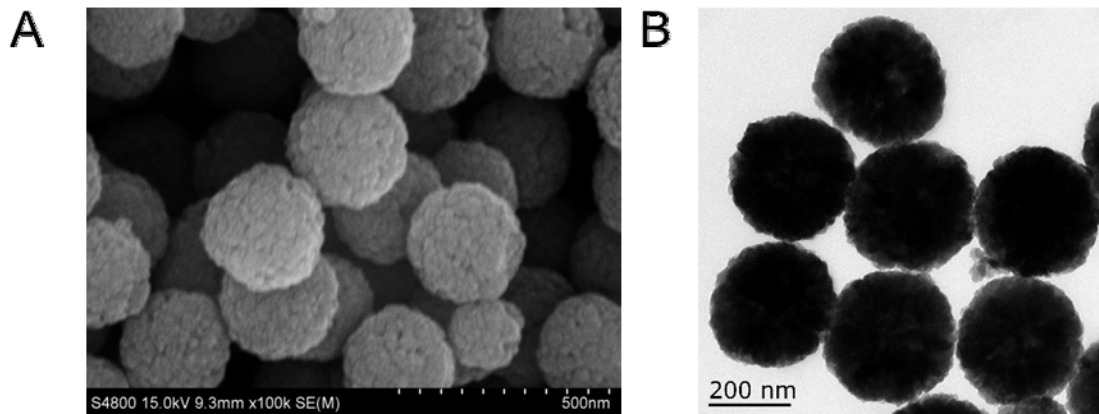

22

23 **Figure S1.** Characterization of prepared IONzymes. (A) The SEM image of the

24 prepared IONzymes. Scale bar: 500 nm. (B) The TEM micrograph of the prepared

25 IONzymes, Scale bar: 200 nm.

26

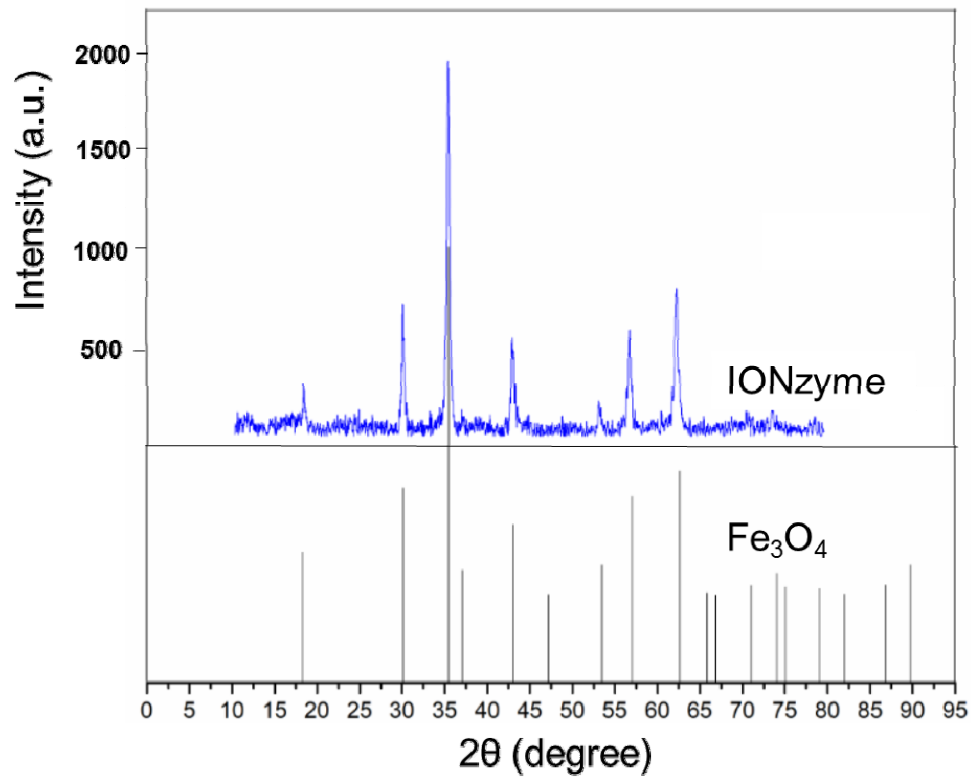

27

28 *Figure S2.* XRD characterization of prepared IONzymes. IONzymes were identified as

29 Fe<sub>3</sub>O<sub>4</sub> nanoparticles.

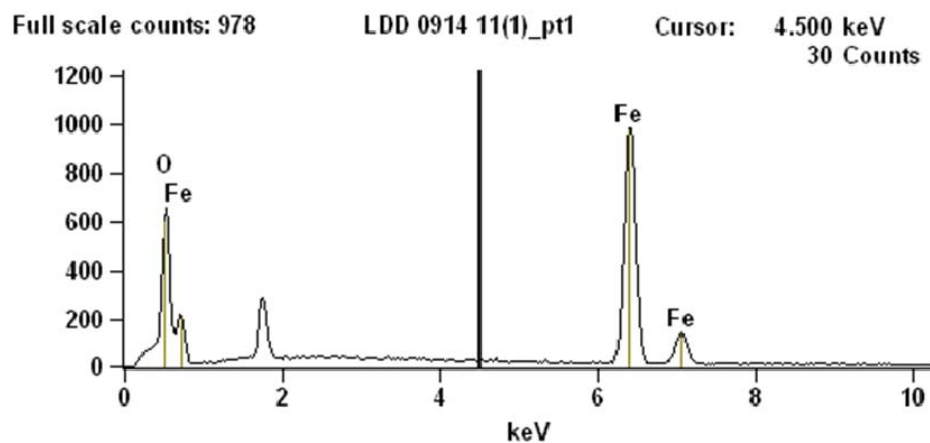

| Component | Weight % | Atom % |
|-----------|----------|--------|
| Fe        | 76.61    | 48.42  |
| O         | 23.39    | 51.58  |

30

31 *Figure S3.* EDS analysis of the components in the product of IONzymes.

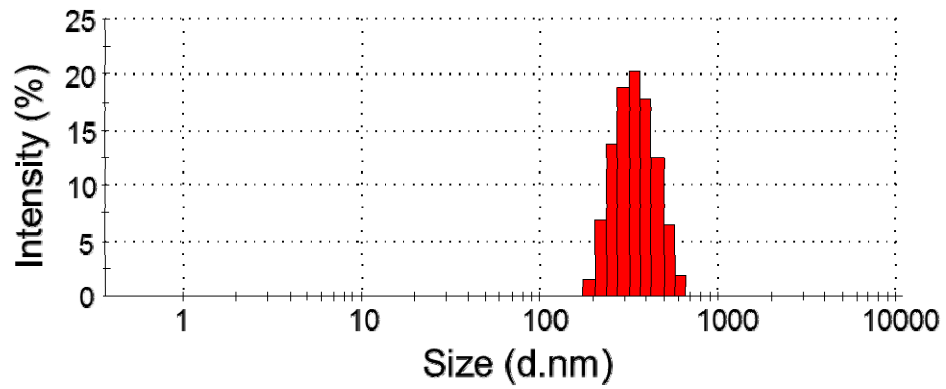

32

33 **Figure S4.** Size analysis with dynamic light scattering. The hydrodynamic diameter  
34 was around 350 nm. Reaction conditions: 50  $\mu\text{g/mL}$  of IONzymes in ddH<sub>2</sub>O at room  
35 temperature.

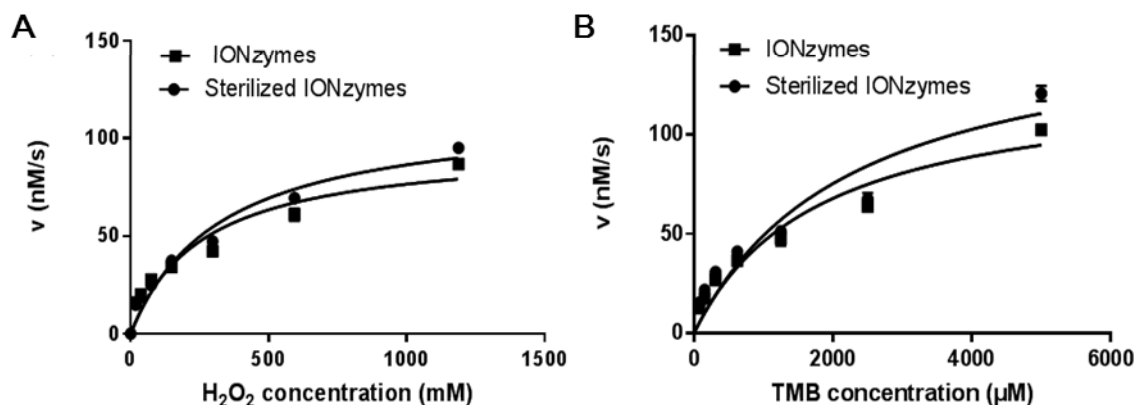

36  
 37 **Figure S5.** Peroxidase-like property followed the Michaelis-Menten kinetic analysis. **(A)**  
 38 The kinetics when H<sub>2</sub>O<sub>2</sub> concentration was variable. The reactions were conducted  
 39 with variable H<sub>2</sub>O<sub>2</sub> amounts in NaAc buffer (0.1M, pH 4.5) containing 10 μg/mL of  
 40 IONzymes (or sterilized IONzymes) and 833.33 μM chromogenic substrate (TMB). **(B)**  
 41 The kinetics when TMB concentration was variable. The reactions were conducted  
 42 with variable TMB amounts in NaAc buffer (0.1M, pH 4.5) containing 10 μg/mL of  
 43 IONzymes (or sterilized IONzymes) and 148.46 mM H<sub>2</sub>O<sub>2</sub>.

44 **Table S1.** Kinetic parameters of IONzymes when H<sub>2</sub>O<sub>2</sub> concentration was variable.

| H <sub>2</sub> O <sub>2</sub>                | IONzyme              | Sterilized IONzyme  |
|----------------------------------------------|----------------------|---------------------|
| Vmax (nM/s )                                 | 96.4                 | 114.5               |
| Kcat (s <sup>-1</sup> )                      | 1.26×10 <sup>5</sup> | 1.5×10 <sup>5</sup> |
| Km (mM)                                      | 259.7                | 325.9               |
| Kcat/Km (mM <sup>-1</sup> ·s <sup>-1</sup> ) | 485.2                | 460.2               |

45

46 **Table S2.** Kinetic parameters of IONzymes when TMB concentration was variable.

| TMB                                          | IONzyme              | Sterilized IONzyme  |
|----------------------------------------------|----------------------|---------------------|
| Vmax (nM/s )                                 | 128.5                | 160.8               |
| Kcat (s <sup>-1</sup> )                      | 1.68×10 <sup>5</sup> | 2.1×10 <sup>5</sup> |
| Km (μM)                                      | 1789                 | 2275                |
| Kcat/Km (μM <sup>-1</sup> ·s <sup>-1</sup> ) | 93.9                 | 92.3                |

47

48

49

50

51

52

53

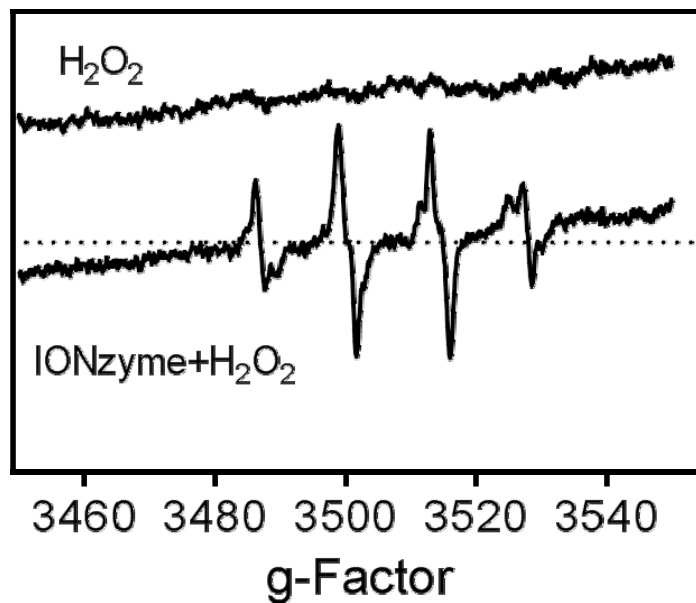

54

55 **Figure S6.** ESR signals of hydroxyl radicals generated by IONzymes in the presence  
56 of H<sub>2</sub>O<sub>2</sub> under acidic condition. The assay was conducted in NaAc buffer (0.1M, pH  
57 4.5) containing 100 µg/mL IONzymes, 200 mM H<sub>2</sub>O<sub>2</sub> and 10 mM BMPO at room  
58 temperature.

59



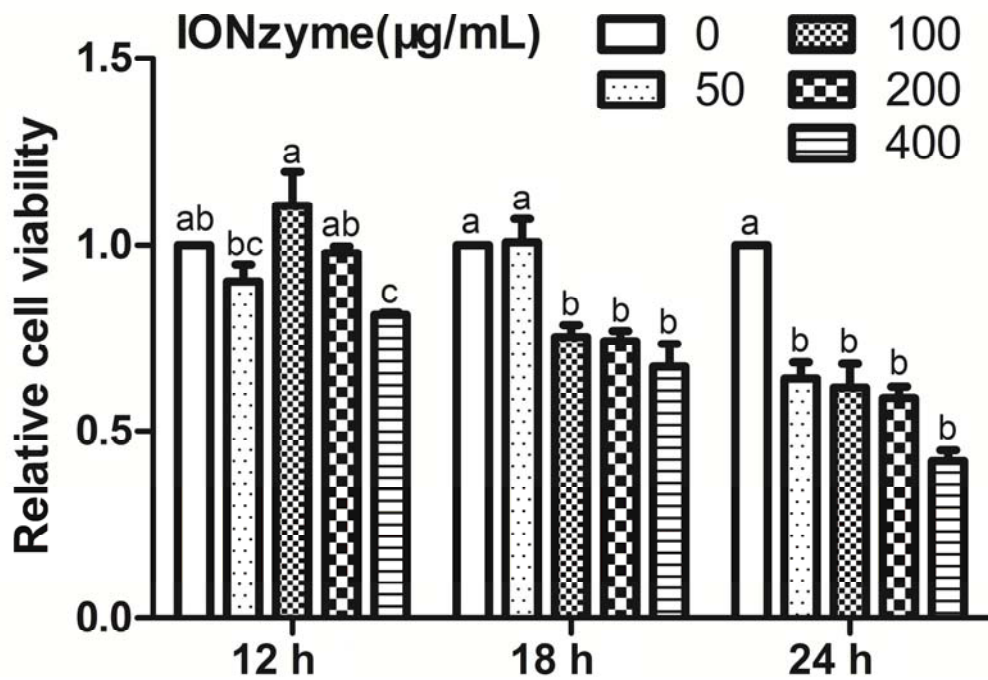

60

61 **Figure S7.** Cell viability assay of *S. Enteritidis* infected-LMH cells treated with different  
 62 concentration of IONzyme at 12, 18 and 24 h. Data shown as average percentage of  
 63 live cells, normalized to *S. Enteritidis* infected-LMH cells without IONzyme (0 µg/mL)  
 64 at different time points. Results presented as Mean ± SEM (n=3). Experiment was  
 65 repeated three times. Different letters indicate statistically significant difference ( $P <$   
 66 0.05).

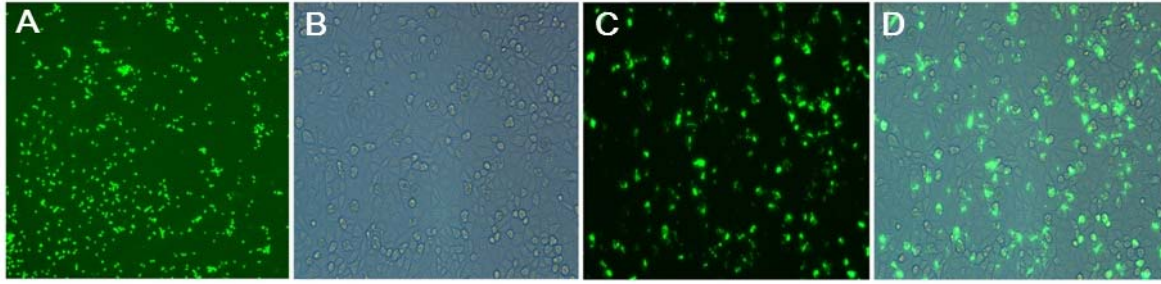

67

68 **Figure S8.** Fluorescence micrograph of GFP-expressing *S. Enteritidis* and LMH cells

69 infected with GFP-expressing *S. Enteritidis*. (A) Fluorescence micrograph of *S.*

70 *Enteritidis* in liquid medium which were transfected with green fluorescent plasmid

71 (pGFPmut3-1). (B) Bright field micrograph of LMH cells which were infected with

72 GFP-expressing *S. Enteritidis*. (C) Fluorescence micrograph of GFP-expressing *S.*

73 *Enteritidis* ( $5 \times 10^7$  CFU/mL) in LMH cells. (D) The merged image of b) and c).

74

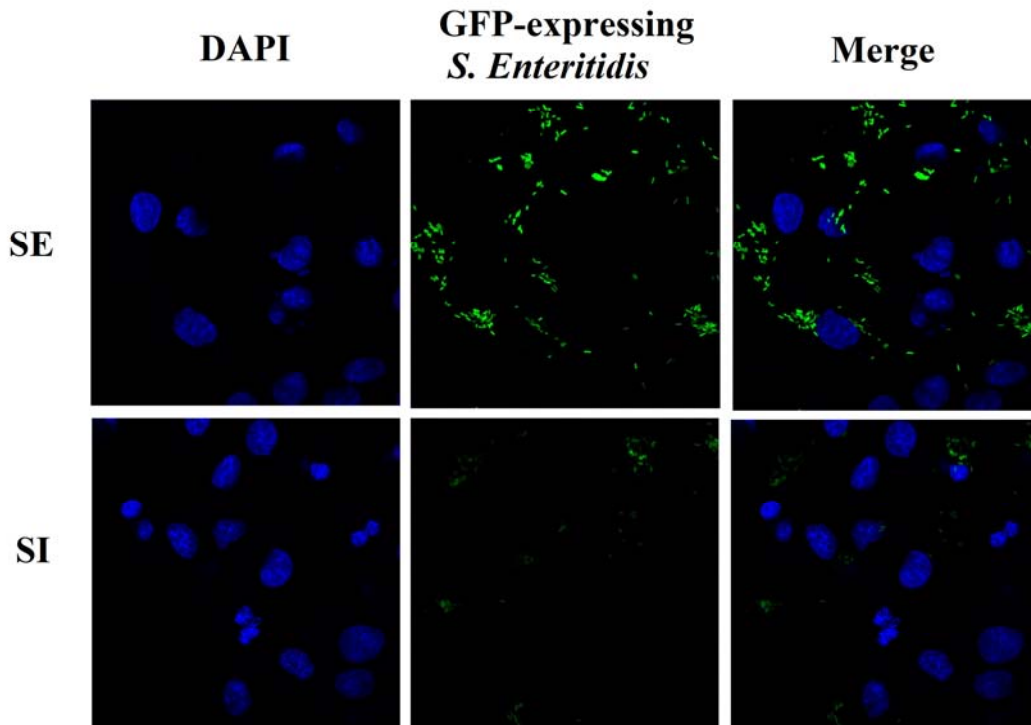

75

76 *Figure S9.* Micrographs of GFP-expressing *S. Enteritidis* (Green dots)-infected LMH

77 cells in the absence (SE) and presence of IONzyme (SI). The blue DAPI fluorescence

78 indicates nucleus of LMH cells, and the green dots indicate GFP-expressing *S.*

79 *Enteritidis*.

80

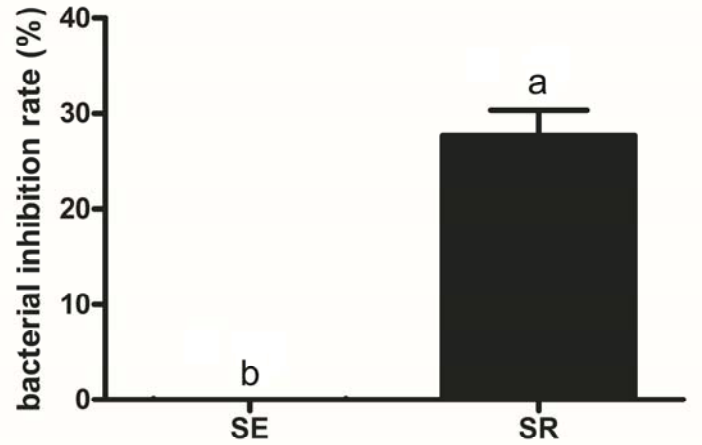

81

82 **Figure S10.** Inhibition of intracellular survival *S. Enteritidis* in infected LMH cells in the

83 absence (SE group) or presence of rapamycin (RAPA, SR group). Data are

84 expressed as percentages of the mean numbers of intracellular CFU relative to levels

85 from SE group at 24 h. Results presented as Mean  $\pm$  SEM (n=3). Experiment was

86 repeated three times. Different letters indicate statistically significant difference ( $P <$

87 0.05).

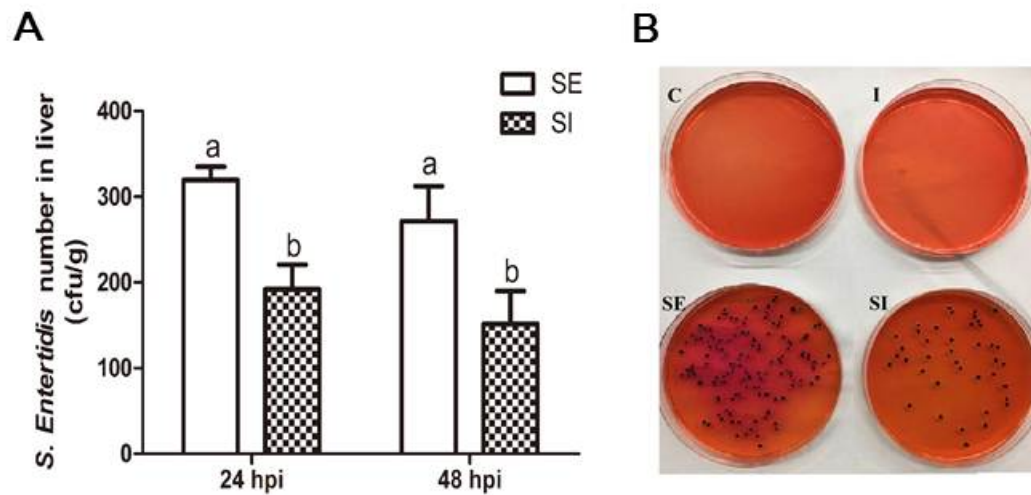

88

89 **Figure S11.** Effects of IONzyme in chicken infected with *S. Enteritidis*. Chicken were  
 90 treated with vehicle control (C), IONzyme alone (I), infected with *S. Enteritidis* in the  
 91 absence (SE) or presence (SI) of IONzyme. **(A)** Bacterial inhibition rates of IONzyme  
 92 at 24 and 48 hpi in liver of *S. Enteritidis* infected chickens. Values represent the Mean  
 93  $\pm$ SEM (n=9). Different small letters indicate statistically significant difference ( $P <$   
 94 0.05). **(B)** Photos of *S. Enteritidis* CFU number of chicken liver.

95

**Table S3.** Up-regulated differentially expressed genes in group SI compared with group SE

| Gene_id   | readcount_SI | readcount_SE | log2FoldChange | P value  |
|-----------|--------------|--------------|----------------|----------|
| 100857889 | 35.75811495  | 9.622193267  | 1.8938         | 0.011215 |
| 100857899 | 36.52365614  | 16.66974239  | 1.1316         | 0.031354 |
| 100857902 | 26.91755387  | 12.02051257  | 1.163          | 0.043054 |
| 100857984 | 442.3678059  | 288.5052396  | 0.61665        | 0.038465 |
| 100858205 | 2017.482806  | 1287.92547   | 0.64751        | 0.022591 |
| 100858343 | 25.05738149  | 6.55551337   | 1.9345         | 0.008804 |
| 101748003 | 52.11634545  | 17.69078549  | 1.5587         | 0.001038 |
| 101748342 | 233.8932735  | 65.1423018   | 1.8442         | 0.000516 |
| 101748649 | 36.89332672  | 15.82080764  | 1.2215         | 0.018314 |
| 101748973 | 45.34441717  | 17.68409456  | 1.3585         | 0.006337 |
| 101749127 | 195.4546735  | 96.56811257  | 1.0172         | 0.032277 |
| 101749229 | 87.55061224  | 46.99286707  | 0.89768        | 0.021245 |
| 101749586 | 1397.449236  | 729.3568901  | 0.9381         | 0.00109  |
| 101750578 | 12.72492571  | 2.940896818  | 2.1133         | 0.019913 |
| 101751160 | 16.12244877  | 5.474796802  | 1.5582         | 0.041392 |
| 101751655 | 36.45933264  | 9.197376122  | 1.987          | 0.011753 |
| 101752332 | 5.661534708  | 0            | Inf            | 0.030721 |
| 107049124 | 6.937259004  | 0            | Inf            | 0.049287 |
| 107049445 | 5.920434285  | 0            | Inf            | 0.047523 |
| 107050343 | 8.446167113  | 1.317158807  | 2.6809         | 0.024262 |

|           |             |             |         |          |
|-----------|-------------|-------------|---------|----------|
| 107050532 | 44.06878767 | 21.06563116 | 1.0649  | 0.039586 |
| 107050552 | 151.7009019 | 70.81660207 | 1.0991  | 0.029266 |
| 107050871 | 35777.83826 | 19892.34771 | 0.84685 | 0.021493 |
| 107051301 | 261.4828576 | 148.3726203 | 0.81749 | 0.009569 |
| 107051726 | 51.82215592 | 23.71374091 | 1.1278  | 0.013468 |
| 107051772 | 220.8388802 | 88.02514859 | 1.327   | 0.025278 |
| 107051936 | 32.41475022 | 7.546497768 | 2.1028  | 0.013434 |
| 107052542 | 16.72006133 | 5.952596493 | 1.49    | 0.039757 |
| 107052582 | 77.0704891  | 40.11764826 | 0.94194 | 0.023328 |
| 107052590 | 16.74066416 | 4.248258022 | 1.9784  | 0.01396  |
| 107053315 | 220.3710463 | 89.30733348 | 1.3031  | 0.001107 |
| 107053383 | 465.2401154 | 299.4376468 | 0.63572 | 0.03187  |
| 107053568 | 20.10602547 | 6.596035564 | 1.608   | 0.017637 |
| 107054014 | 18.68074474 | 5.801637103 | 1.687   | 0.018657 |
| 107054179 | 164.5820803 | 69.57113316 | 1.2422  | 0.028673 |
| 107054419 | 15.02521967 | 5.208517828 | 1.5284  | 0.048966 |
| 107054433 | 18.53611165 | 6.956929098 | 1.4138  | 0.048963 |
| 107054646 | 25.32000024 | 6.822902165 | 1.8918  | 0.003307 |
| 107057116 | 28.43689964 | 6.670832955 | 2.0918  | 0.025162 |
| 112530424 | 14.64972819 | 4.564856792 | 1.6822  | 0.035009 |
| 112530896 | 54.26838194 | 28.07687459 | 0.95073 | 0.033603 |
| 112531545 | 11.1021525  | 0.336859868 | 5.0425  | 0.019221 |

|           |             |             |         |          |
|-----------|-------------|-------------|---------|----------|
| 112531586 | 11.40889332 | 1.573418214 | 2.8582  | 0.037647 |
| 112532141 | 28.43519929 | 13.0615948  | 1.1223  | 0.045289 |
| 112532487 | 18.8910003  | 6.108438272 | 1.6288  | 0.023288 |
| 112532491 | 36.26767297 | 9.570985615 | 1.9219  | 0.014229 |
| 112532524 | 13.12845838 | 1.010579603 | 3.6994  | 0.000657 |
| 112532901 | 17.5600912  | 3.277978649 | 2.4214  | 0.002693 |
| 112532951 | 7.086414051 | 0.950018276 | 2.899   | 0.034109 |
| 112532968 | 60.53406999 | 30.73300705 | 0.97796 | 0.021616 |
| 112533350 | 10.62655138 | 2.307699276 | 2.2031  | 0.035359 |
| 373902    | 2113.558971 | 1345.974717 | 0.65102 | 0.021235 |
| 374010    | 82.96368497 | 44.80318377 | 0.88888 | 0.040633 |
| 374116    | 728.0631736 | 458.5981478 | 0.66683 | 0.0221   |
| 374131    | 192.3139483 | 121.8517876 | 0.65834 | 0.046455 |
| 378924    | 4025.002613 | 2600.026444 | 0.63046 | 0.023676 |
| 395357    | 244.3857481 | 120.6156395 | 1.0187  | 0.041909 |
| 395480    | 1898.575829 | 792.0898105 | 1.2612  | 0.001369 |
| 395562    | 42.4601713  | 16.25852906 | 1.3849  | 0.037353 |
| 395650    | 674.3463621 | 339.9509069 | 0.98816 | 0.019909 |
| 395686    | 48.56604296 | 21.67276454 | 1.1641  | 0.021421 |
| 395694    | 227.3962547 | 137.5930726 | 0.7248  | 0.049249 |
| 396025    | 22974.06219 | 12010.68298 | 0.93569 | 0.036037 |
| 396048    | 81.70614328 | 30.99839817 | 1.3983  | 0.01065  |



|        |             |             |         |          |
|--------|-------------|-------------|---------|----------|
| 396057 | 896.6049377 | 547.5931983 | 0.71137 | 0.048748 |
| 396091 | 28574.60346 | 17087.11929 | 0.74182 | 0.008221 |
| 396099 | 101.5825264 | 59.01382357 | 0.78353 | 0.035607 |
| 396256 | 169.5964728 | 73.59762893 | 1.2044  | 0.001998 |
| 396273 | 39.38989709 | 8.054356158 | 2.29    | 0.007774 |
| 396485 | 2731.053225 | 1205.410932 | 1.1799  | 0.003688 |
| 396489 | 7407.128158 | 2313.198411 | 1.679   | 0.001612 |
| 396494 | 3867.181534 | 2397.447115 | 0.68978 | 0.0135   |
| 396532 | 151.7360038 | 89.54621733 | 0.76086 | 0.036479 |
| 408024 | 2833.347782 | 1520.637706 | 0.89783 | 0.004569 |
| 414341 | 11170.07102 | 6801.905269 | 0.71563 | 0.046993 |
| 415489 | 152.6170986 | 78.91832603 | 0.95148 | 0.017215 |
| 415560 | 37.47396083 | 17.46480674 | 1.1014  | 0.029723 |
| 415724 | 32.98763938 | 10.55217241 | 1.6444  | 0.005556 |
| 415895 | 532.7195936 | 288.3095079 | 0.88576 | 0.00693  |
| 416148 | 209.0165247 | 87.93427378 | 1.2491  | 0.014205 |
| 416163 | 92.59612809 | 43.70642261 | 1.0831  | 0.013468 |
| 416303 | 440.7547743 | 287.1844317 | 0.618   | 0.041124 |
| 416328 | 2180.986799 | 1132.599391 | 0.94534 | 0.041173 |
| 416575 | 272.4100592 | 117.3534843 | 1.2149  | 0.021923 |
| 416651 | 1201.427523 | 577.3073827 | 1.0573  | 0.037165 |
| 416652 | 2396.42671  | 1213.730404 | 0.98144 | 0.033101 |

|        |             |             |         |          |
|--------|-------------|-------------|---------|----------|
| 416716 | 69.02806645 | 36.26658947 | 0.92854 | 0.025661 |
| 416768 | 274.3601273 | 127.5329679 | 1.1052  | 0.000598 |
| 416782 | 421.5297    | 263.8747676 | 0.67578 | 0.027199 |
| 416783 | 1765.135916 | 929.5909374 | 0.92511 | 0.016633 |
| 416868 | 225.4130444 | 119.7945446 | 0.91201 | 0.017849 |
| 416875 | 444.6153472 | 270.1101981 | 0.71901 | 0.01665  |
| 416910 | 181.8216871 | 112.1590134 | 0.69698 | 0.035513 |
| 416933 | 3983.56016  | 2302.915787 | 0.7906  | 0.036191 |
| 416967 | 456.790149  | 222.7712714 | 1.036   | 0.012752 |
| 417013 | 1463.38473  | 501.6378636 | 1.5446  | 0.028676 |
| 417227 | 1587.442334 | 779.5145477 | 1.0261  | 0.013841 |
| 417245 | 158.7709404 | 88.3009712  | 0.84645 | 0.013208 |
| 417387 | 792.0402495 | 503.9027554 | 0.65243 | 0.02626  |
| 417439 | 1191.604154 | 710.2487477 | 0.74651 | 0.031514 |
| 417440 | 2232.888401 | 630.6562715 | 1.824   | 0.015561 |
| 417628 | 351.6466219 | 213.830855  | 0.71766 | 0.045038 |
| 417647 | 530.9375711 | 173.637519  | 1.6125  | 0.009347 |
| 417963 | 399.0831673 | 237.8211148 | 0.74681 | 0.028389 |
| 418201 | 2162.446994 | 1139.643622 | 0.92408 | 0.028196 |
| 418237 | 216.2090811 | 131.2377606 | 0.72024 | 0.026564 |
| 418298 | 771.9992794 | 435.1342621 | 0.82714 | 0.006742 |
| 418311 | 548.2864933 | 300.4972119 | 0.86758 | 0.021619 |

|        |             |             |         |          |
|--------|-------------|-------------|---------|----------|
| 418495 | 694.4562463 | 417.4844436 | 0.73416 | 0.012499 |
| 418528 | 370.6588292 | 216.9246744 | 0.7729  | 0.012331 |
| 418715 | 357.3471998 | 208.9081785 | 0.77446 | 0.011247 |
| 418924 | 160.4301736 | 100.0467382 | 0.68127 | 0.048631 |
| 419051 | 917.1271761 | 344.3900134 | 1.4131  | 6.36E-05 |
| 419091 | 678.5692755 | 357.461151  | 0.92471 | 0.032355 |
| 419142 | 3031.300464 | 1976.161247 | 0.61724 | 0.027468 |
| 419407 | 402.7006002 | 212.7703322 | 0.92041 | 0.008731 |
| 419480 | 3542.791549 | 1799.475917 | 0.97731 | 0.022645 |
| 419784 | 8.547174327 | 1.30713924  | 2.709   | 0.040268 |
| 419824 | 34.06497363 | 15.95172789 | 1.0946  | 0.03499  |
| 419832 | 1999.088019 | 1303.198489 | 0.61729 | 0.032972 |
| 420133 | 1815.362702 | 1108.364362 | 0.71183 | 0.037317 |
| 420534 | 412.831781  | 39.34110293 | 3.3914  | 0.031696 |
| 420689 | 1225.714437 | 505.4701511 | 1.2779  | 0.032897 |
| 420695 | 40.79247326 | 16.86188987 | 1.2745  | 0.011115 |
| 420819 | 1368.651476 | 910.0212836 | 0.58878 | 0.039414 |
| 421106 | 191.9455886 | 113.9045063 | 0.75287 | 0.044237 |
| 421114 | 1162.201635 | 713.4589748 | 0.70396 | 0.026289 |
| 421152 | 2651.604315 | 847.0571431 | 1.6463  | 0.004236 |
| 421278 | 581.0653106 | 344.8908933 | 0.75256 | 0.038209 |
| 421282 | 2884.146982 | 1757.380905 | 0.71472 | 0.010895 |

|        |             |             |         |          |
|--------|-------------|-------------|---------|----------|
| 421405 | 97.95294081 | 57.24803592 | 0.77486 | 0.039272 |
| 421809 | 170.882457  | 79.73346398 | 1.0997  | 0.017044 |
| 421887 | 34.9420886  | 16.03632289 | 1.1236  | 0.033777 |
| 422053 | 139.2249121 | 77.99573735 | 0.83595 | 0.016904 |
| 422077 | 384.5369244 | 232.9607097 | 0.72304 | 0.043742 |
| 422384 | 139.5658676 | 51.1295789  | 1.4487  | 5.93E-05 |
| 422403 | 219.0519924 | 109.2158969 | 1.0041  | 0.026014 |
| 422493 | 449.5744629 | 194.0521348 | 1.2121  | 0.013805 |
| 422611 | 91.20009271 | 52.55628705 | 0.79517 | 0.037793 |
| 422765 | 1219.110058 | 806.9633845 | 0.59525 | 0.037819 |
| 422802 | 1031.292726 | 398.7225533 | 1.371   | 0.015944 |
| 422860 | 2268.802583 | 1149.901751 | 0.98042 | 0.000522 |
| 422889 | 67.35844437 | 34.51237513 | 0.96475 | 0.039269 |
| 423016 | 12.53948834 | 1.276858577 | 3.2958  | 0.031977 |
| 423064 | 443.0987771 | 232.6450661 | 0.9295  | 0.002373 |
| 423144 | 363.7645932 | 197.8132731 | 0.87887 | 0.026584 |
| 423154 | 1565.556703 | 866.5927863 | 0.85325 | 0.03598  |
| 423158 | 33.03296561 | 8.873676141 | 1.8963  | 0.001008 |
| 423216 | 54.47411554 | 20.41927373 | 1.4156  | 0.046354 |
| 423225 | 3309.596541 | 1946.241522 | 0.76596 | 0.006404 |
| 423339 | 2312.679015 | 1524.534123 | 0.6012  | 0.032373 |
| 423390 | 549.6565785 | 339.9021384 | 0.69341 | 0.037089 |

|        |             |             |         |          |
|--------|-------------|-------------|---------|----------|
| 423435 | 191.7595023 | 35.75895304 | 2.4229  | 0.045772 |
| 423456 | 3277.492265 | 2131.479767 | 0.62074 | 0.033369 |
| 423457 | 1743.182352 | 612.8635598 | 1.5081  | 0.000222 |
| 423506 | 63.34432336 | 22.98947942 | 1.4622  | 0.000957 |
| 423587 | 380.9932678 | 216.2890697 | 0.8168  | 0.006847 |
| 423588 | 1461.522575 | 829.7858287 | 0.81666 | 0.012335 |
| 423664 | 767.8853109 | 351.3297577 | 1.1281  | 0.030391 |
| 423767 | 1603.400425 | 959.7647184 | 0.74038 | 0.009305 |
| 423792 | 6195.725259 | 1016.667278 | 2.6074  | 0.010689 |
| 423809 | 192.1026782 | 110.4960513 | 0.79788 | 0.048608 |
| 423857 | 1300.296148 | 829.4726242 | 0.64857 | 0.023881 |
| 423882 | 17.23284235 | 5.962616059 | 1.5311  | 0.038718 |
| 423888 | 296.1059044 | 189.7294905 | 0.64217 | 0.0406   |
| 423961 | 8.10323877  | 1.664260205 | 2.2836  | 0.046503 |
| 424028 | 4378.210183 | 2058.866906 | 1.0885  | 0.024583 |
| 424033 | 429.7961365 | 131.1432133 | 1.7125  | 0.049165 |
| 424112 | 5448.829065 | 3408.264569 | 0.67691 | 0.015223 |
| 424130 | 113.655776  | 67.15455044 | 0.75911 | 0.035657 |
| 424168 | 25.05003792 | 10.46691152 | 1.259   | 0.035764 |
| 424253 | 871.6527169 | 545.8032448 | 0.67537 | 0.021403 |
| 424354 | 367.7093282 | 222.9990258 | 0.72153 | 0.0451   |
| 424374 | 922.0622231 | 600.3256563 | 0.61912 | 0.031095 |

|        |             |             |         |          |
|--------|-------------|-------------|---------|----------|
| 424434 | 532.0551647 | 344.2723429 | 0.62803 | 0.037641 |
| 424440 | 22370.08988 | 10016.00008 | 1.1593  | 0.013963 |
| 424471 | 409.4945278 | 259.5514895 | 0.65782 | 0.033013 |
| 424484 | 163.9585862 | 91.07153457 | 0.84826 | 0.013361 |
| 424535 | 926.686295  | 596.6610974 | 0.63517 | 0.027159 |
| 424666 | 4169.396765 | 2195.072485 | 0.92557 | 0.001073 |
| 424877 | 3257.507885 | 1611.885927 | 1.015   | 0.043916 |
| 425113 | 224.2289162 | 134.1710786 | 0.7409  | 0.021535 |
| 426146 | 30.82413877 | 13.87980496 | 1.1511  | 0.037077 |
| 426250 | 753.9997166 | 471.3953964 | 0.67763 | 0.026419 |
| 426534 | 1948.048457 | 1056.095837 | 0.88329 | 0.016878 |
| 426754 | 17.31817007 | 4.564856792 | 1.9236  | 0.030505 |
| 426871 | 1828.33992  | 666.3717167 | 1.4561  | 0.018636 |
| 426872 | 14.81093834 | 2.277418613 | 2.7012  | 0.004574 |
| 427000 | 113.2104126 | 58.0415137  | 0.96385 | 0.047853 |
| 427008 | 483.9825517 | 308.3282226 | 0.65049 | 0.02877  |
| 427091 | 412.519947  | 212.605104  | 0.95629 | 0.009445 |
| 427207 | 103.0964408 | 43.29054885 | 1.2519  | 0.036991 |
| 427391 | 14140.3699  | 4976.686145 | 1.5066  | 0.012211 |
| 427592 | 340.2761007 | 220.7481498 | 0.6243  | 0.043658 |
| 427605 | 14.10116103 | 4.585117889 | 1.6208  | 0.045742 |
| 428333 | 3207.786346 | 905.3430864 | 1.825   | 0.029776 |

|            |             |             |         |          |
|------------|-------------|-------------|---------|----------|
| 428743     | 8144.920375 | 3771.535572 | 1.1107  | 7.63E-05 |
| 428953     | 41.53893428 | 12.63300509 | 1.7173  | 0.011769 |
| 429536     | 687.9168871 | 438.4434446 | 0.64984 | 0.025666 |
| 768548     | 48.17899255 | 18.56578441 | 1.3758  | 0.005367 |
| 769044     | 35.83690189 | 14.42862948 | 1.3125  | 0.011535 |
| 769191     | 12.93056452 | 3.56451872  | 1.859   | 0.032489 |
| 769579     | 298.8297429 | 182.3092526 | 0.71294 | 0.021984 |
| 770203     | 967.7281812 | 273.0343533 | 1.8255  | 1.22E-05 |
| 770334     | 914.7011844 | 585.2160426 | 0.64433 | 0.025903 |
| 770846     | 63.12430402 | 30.91668789 | 1.0298  | 0.047328 |
| 771001     | 120.7139252 | 68.22569137 | 0.82321 | 0.023188 |
| 771137     | 99.83873416 | 55.26850873 | 0.85314 | 0.024828 |
| 771738     | 174.6325536 | 72.88738236 | 1.2606  | 0.000391 |
| 771871     | 10.3030217  | 2.358019073 | 2.1274  | 0.032448 |
| 772289     | 1607.879029 | 893.2059996 | 0.84809 | 0.011112 |
| 772378     | 4.802602353 | 0.336859868 | 3.8336  | 0.049119 |
| 776552     | 230.0427948 | 139.125745  | 0.72551 | 0.026975 |
| 777252     | 12.83417405 | 3.534016093 | 1.8606  | 0.045214 |
| 777408     | 7.764430993 | 1.34743947  | 2.5267  | 0.036536 |
| Novel00009 | 108.8276356 | 39.80929416 | 1.4509  | 0.000138 |
| Novel00084 | 39.16485961 | 5.851734936 | 2.7426  | 0.008788 |
| Novel00314 | 19.75727622 | 1.684299338 | 3.5522  | 0.012331 |

---

**Table S4.** Down-regulated differentially expressed genes in group SI compared with group SE

| Gene_id   | readcount_SI | readcount_SE | log2FoldChange | P value  |
|-----------|--------------|--------------|----------------|----------|
| 100315749 | 2.425623185  | 16.24895342  | -2.7439        | 0.001717 |
| 100857281 | 188.2252557  | 328.7227623  | -0.80441       | 0.00922  |
| 100857521 | 3786.976082  | 11013.47058  | -1.5402        | 0.033812 |
| 100857604 | 14.85254539  | 37.3454975   | -1.3302        | 0.031596 |
| 100857637 | 193.7894417  | 351.461021   | -0.85887       | 0.007042 |
| 100857679 | 57.51436383  | 144.5368409  | -1.3294        | 0.002456 |
| 100857896 | 1.658559341  | 10.32663759  | -2.6384        | 0.022878 |
| 100858049 | 10.88003143  | 32.93496238  | -1.5979        | 0.005085 |
| 100858236 | 623.0261425  | 1222.261293  | -0.97219       | 0.009261 |
| 100859636 | 148.0215748  | 775.9283536  | -2.3901        | 2.31E-06 |
| 100859828 | 200.7962541  | 591.8027917  | -1.5594        | 0.001549 |
| 101747681 | 0.351169475  | 5.147734537  | -3.8737        | 0.040895 |
| 101747982 | 64.18887519  | 204.9999543  | -1.6752        | 0.000105 |
| 101748153 | 72.53945461  | 123.3706703  | -0.76616       | 0.031591 |
| 101748650 | 887.706917   | 4460.444002  | -2.329         | 2.90E-05 |
| 101749238 | 7.861719028  | 58.46078338  | -2.8946        | 3.15E-06 |
| 101749898 | 4.3339434    | 21.70770563  | -2.3245        | 0.017348 |
| 101751423 | 541.9583019  | 850.2170171  | -0.64965       | 0.023683 |
| 107049075 | 536.1383298  | 1028.18207   | -0.93942       | 0.001315 |
| 107049500 | 14.69425164  | 76.4759011   | -2.3798        | 0.007281 |



---

|           |             |             |          |          |
|-----------|-------------|-------------|----------|----------|
| 107049692 | 2.376979168 | 9.898713772 | -2.0581  | 0.044787 |
| 107051046 | 60.54141355 | 125.8935964 | -1.0562  | 0.00776  |
| 107051757 | 31.75231797 | 70.16850258 | -1.144   | 0.014023 |
| 107051858 | 235.1069657 | 557.0800143 | -1.2446  | 0.045861 |
| 107053430 | 96.34524421 | 176.6518174 | -0.87462 | 0.017695 |
| 107053863 | 9.447312342 | 25.37888897 | -1.4257  | 0.022608 |
| 107054594 | 9.132826574 | 23.48284695 | -1.3625  | 0.031197 |
| 107054809 | 283.8821742 | 545.6891594 | -0.94279 | 0.00245  |
| 107054965 | 1.025065851 | 9.77714719  | -3.2537  | 0.021064 |
| 107054990 | 51.77864704 | 115.4151452 | -1.1564  | 0.020198 |
| 107055302 | 5.210656977 | 23.44945961 | -2.17    | 0.033186 |
| 107055491 | 20.19045563 | 47.02536738 | -1.2198  | 0.011468 |
| 107056280 | 237.1609085 | 402.6069001 | -0.76351 | 0.01319  |
| 107056410 | 4.144786854 | 20.35871241 | -2.2963  | 0.008972 |
| 107057229 | 0.980542399 | 7.037751522 | -2.8435  | 0.040773 |
| 107057318 | 289.3892291 | 556.7092682 | -0.94391 | 0.0324   |
| 112530177 | 1.400557334 | 9.550946482 | -2.7696  | 0.014348 |
| 112530755 | 0           | 4.086835138 | #NAME?   | 0.037332 |
| 112530970 | 14.43083011 | 35.50713209 | -1.299   | 0.025069 |
| 112531294 | 8.551294893 | 30.22758944 | -1.8217  | 0.010324 |
| 112531571 | 4.455553444 | 17.03732685 | -1.935   | 0.012173 |
| 112531627 | 7.151138946 | 21.84886741 | -1.6113  | 0.015577 |

---

|           |             |             |          |          |
|-----------|-------------|-------------|----------|----------|
| 112531894 | 33.61642133 | 74.69635496 | -1.1519  | 0.019039 |
| 112532442 | 349.7826339 | 964.8105722 | -1.4638  | 2.22E-05 |
| 112532483 | 0.70233895  | 6.610049664 | -3.2344  | 0.049784 |
| 112532519 | 48.33993021 | 103.0172506 | -1.0916  | 0.031765 |
| 112532872 | 37.22410515 | 80.75691422 | -1.1173  | 0.04669  |
| 112532904 | 20.42051124 | 67.62543724 | -1.7275  | 0.000107 |
| 373903    | 1068.143086 | 12628.39529 | -3.5635  | 0.000275 |
| 373904    | 384.7675916 | 600.7822959 | -0.64286 | 0.030901 |
| 373960    | 161.2009907 | 296.1054412 | -0.87725 | 0.005166 |
| 374174    | 72.18608861 | 123.3899763 | -0.77343 | 0.02837  |
| 374182    | 517.8758759 | 785.2441088 | -0.60053 | 0.041856 |
| 395144    | 7.376979198 | 22.98079163 | -1.6393  | 0.013911 |
| 395148    | 321.4679694 | 541.0480187 | -0.75108 | 0.012432 |
| 395215    | 74.58779117 | 200.9224072 | -1.4296  | 0.012914 |
| 395254    | 74.83835482 | 128.37144   | -0.77847 | 0.029796 |
| 395450    | 116.4666426 | 188.3806528 | -0.69373 | 0.034892 |
| 395488    | 3326.285432 | 5224.94388  | -0.6515  | 0.022026 |
| 395594    | 16.66769813 | 49.37713945 | -1.5668  | 0.001186 |
| 395604    | 41.69050954 | 103.0927138 | -1.3062  | 0.021321 |
| 395685    | 5658.278763 | 8600.51648  | -0.60406 | 0.033562 |
| 395826    | 6.453321948 | 20.98277824 | -1.7011  | 0.030458 |
| 395853    | 16033.60476 | 26063.17377 | -0.70091 | 0.012086 |

---

|        |             |             |          |          |
|--------|-------------|-------------|----------|----------|
| 395856 | 8.397924483 | 29.96866729 | -1.8354  | 0.006699 |
| 396069 | 1167.383536 | 2401.288662 | -1.0405  | 0.024563 |
| 396182 | 1655.864265 | 2511.413593 | -0.60092 | 0.036426 |
| 396257 | 810.9696358 | 1720.670037 | -1.0853  | 0.000629 |
| 396267 | 8.483252207 | 23.50266412 | -1.4701  | 0.021281 |
| 396269 | 31.52638292 | 238.2590791 | -2.9179  | 0.021105 |
| 396336 | 10.12532928 | 32.77442735 | -1.6946  | 0.003367 |
| 396361 | 503.8683757 | 997.3396353 | -0.98504 | 0.04712  |
| 396404 | 21.63061307 | 48.46342688 | -1.1638  | 0.014221 |
| 396423 | 16.67141731 | 40.92805849 | -1.2957  | 0.010125 |
| 396487 | 11587.24744 | 24742.6696  | -1.0945  | 0.013162 |
| 396512 | 133.8241062 | 348.5399516 | -1.381   | 0.005868 |
| 404752 | 180.8496096 | 357.2014301 | -0.98195 | 0.001528 |
| 404756 | 5566.576696 | 14601.32154 | -1.3912  | 4.26E-06 |
| 408039 | 19.75807899 | 92.37531152 | -2.2251  | 0.001907 |
| 408043 | 12.26078871 | 54.34474294 | -2.1481  | 0.019788 |
| 414849 | 104.3323873 | 171.6212447 | -0.71804 | 0.034226 |
| 415473 | 500.8886857 | 927.3027841 | -0.88855 | 0.002358 |
| 415580 | 925.9160584 | 1526.902182 | -0.72165 | 0.025416 |
| 415661 | 351.4235691 | 1263.271617 | -1.8459  | 0.000448 |
| 415706 | 1081.527623 | 2017.134015 | -0.89924 | 0.001415 |
| 415708 | 480.9814648 | 835.3201451 | -0.79635 | 0.012857 |

---

|        |             |             |          |          |
|--------|-------------|-------------|----------|----------|
| 416049 | 128.1850035 | 225.899846  | -0.81746 | 0.012177 |
| 416070 | 4.418869737 | 15.7609122  | -1.8346  | 0.021072 |
| 416147 | 1531.407177 | 2457.757106 | -0.68248 | 0.015286 |
| 416306 | 379.8444664 | 720.2314435 | -0.92305 | 0.035519 |
| 416367 | 1157.382019 | 2404.702777 | -1.055   | 0.018107 |
| 416421 | 655.0648222 | 1057.605138 | -0.69109 | 0.017326 |
| 416555 | 342.3487815 | 531.5697173 | -0.63479 | 0.034388 |
| 416647 | 2356.533744 | 4235.522349 | -0.84587 | 0.02803  |
| 416743 | 261.3772797 | 594.8778373 | -1.1865  | 0.005329 |
| 416745 | 822.0179434 | 1328.000683 | -0.69201 | 0.028046 |
| 416778 | 377.9514243 | 788.4269522 | -1.0608  | 0.020527 |
| 416800 | 642.6792877 | 1213.740798 | -0.91729 | 0.006667 |
| 416811 | 650.8131596 | 1184.64334  | -0.86414 | 0.002832 |
| 416836 | 760.8549942 | 1237.210249 | -0.7014  | 0.032116 |
| 417415 | 293.8720091 | 479.8414573 | -0.70737 | 0.04644  |
| 417708 | 248.6542082 | 432.7134325 | -0.79927 | 0.009013 |
| 417757 | 678.7382888 | 1289.891171 | -0.92632 | 0.049414 |
| 417957 | 29.82791688 | 57.09799803 | -0.93678 | 0.03326  |
| 418141 | 41.70447679 | 75.52236586 | -0.8567  | 0.049525 |
| 418174 | 135.3370401 | 242.4743408 | -0.84128 | 0.009369 |
| 418233 | 1482.672665 | 2610.927274 | -0.81636 | 0.047117 |
| 418380 | 475.9264002 | 972.1831929 | -1.0305  | 0.001687 |

---

|        |             |             |          |          |
|--------|-------------|-------------|----------|----------|
| 418487 | 88.31746429 | 598.914303  | -2.7616  | 0.039038 |
| 418488 | 2345.082592 | 5073.300932 | -1.1133  | 8.82E-05 |
| 418582 | 203.6393431 | 322.0243106 | -0.66115 | 0.032162 |
| 418610 | 2031.461001 | 4057.275983 | -0.99799 | 0.000384 |
| 418611 | 120.9982903 | 367.9878612 | -1.6047  | 0.004396 |
| 418885 | 77.78791656 | 133.7364647 | -0.78177 | 0.02611  |
| 419045 | 65.49456471 | 108.279416  | -0.72531 | 0.044734 |
| 419176 | 534.1865733 | 901.2268835 | -0.75455 | 0.010326 |
| 419181 | 41.93363484 | 81.40904107 | -0.95708 | 0.015872 |
| 419197 | 124.3699806 | 198.4802026 | -0.67436 | 0.040519 |
| 419198 | 574.2292396 | 983.5993543 | -0.77644 | 0.038115 |
| 419297 | 4.075941394 | 13.82637849 | -1.7622  | 0.042917 |
| 419435 | 566.9387598 | 919.8053687 | -0.69814 | 0.016583 |
| 419618 | 1363.981597 | 2349.320804 | -0.78442 | 0.030536 |
| 419690 | 271.1462806 | 436.5230468 | -0.68699 | 0.024187 |
| 420089 | 286.3353083 | 538.4175939 | -0.91102 | 0.002219 |
| 420090 | 6042.05891  | 27737.89824 | -2.1987  | 0.002832 |
| 420212 | 863.7716245 | 3332.309822 | -1.9478  | 4.00E-09 |
| 420249 | 129.4146936 | 200.2697675 | -0.62994 | 0.04868  |
| 420292 | 321.114014  | 593.9798777 | -0.88733 | 0.003107 |
| 420293 | 297.2825189 | 490.4549578 | -0.72229 | 0.01707  |
| 420340 | 49.13261502 | 161.9077327 | -1.7204  | 2.14E-06 |

---

|        |             |             |          |          |
|--------|-------------|-------------|----------|----------|
| 420599 | 121.6518682 | 266.353024  | -1.1306  | 0.007669 |
| 420827 | 149.1881677 | 275.7144841 | -0.88604 | 0.005774 |
| 420854 | 152.1511886 | 369.3956064 | -1.2797  | 0.018774 |
| 420883 | 56.60406065 | 108.1498284 | -0.93405 | 0.046085 |
| 420965 | 38.42323904 | 92.77638425 | -1.2718  | 0.035117 |
| 420999 | 229.168417  | 350.027432  | -0.61106 | 0.046662 |
| 421013 | 1208.36682  | 2553.45296  | -1.0794  | 0.011029 |
| 421127 | 744.9564379 | 1128.229246 | -0.59883 | 0.03909  |
| 421226 | 291.107544  | 965.5312388 | -1.7298  | 0.000107 |
| 421368 | 284.8035889 | 567.0806228 | -0.99359 | 0.003456 |
| 421369 | 69.19177972 | 219.7698501 | -1.6673  | 0.023341 |
| 421681 | 36.79603868 | 92.95197591 | -1.3369  | 0.000659 |
| 421688 | 443.420297  | 795.6820899 | -0.84352 | 0.004075 |
| 421841 | 315.4728465 | 479.504732  | -0.60403 | 0.04325  |
| 421867 | 4.790240655 | 36.09739948 | -2.9137  | 0.009634 |
| 421922 | 143.2524212 | 308.3460749 | -1.106   | 0.000531 |
| 421979 | 528.4154793 | 871.6746582 | -0.72212 | 0.031097 |
| 422049 | 772.0663594 | 1179.932416 | -0.61191 | 0.03556  |
| 422257 | 33.43470314 | 78.22967151 | -1.2264  | 0.047581 |
| 422417 | 436.2605865 | 859.4744512 | -0.97826 | 0.00209  |
| 422418 | 368.1157404 | 637.375514  | -0.79198 | 0.015555 |
| 422428 | 449.0174237 | 1000.036016 | -1.1552  | 0.034358 |

---

|        |             |             |          |          |
|--------|-------------|-------------|----------|----------|
| 422665 | 134.1729843 | 214.7126667 | -0.67831 | 0.036567 |
| 422673 | 4.774159778 | 14.74966671 | -1.6274  | 0.040934 |
| 422692 | 113.7945763 | 181.2318318 | -0.6714  | 0.04401  |
| 422931 | 1260.479874 | 1935.571194 | -0.61879 | 0.027196 |
| 422932 | 1311.258047 | 3112.721766 | -1.2472  | 0.000273 |
| 423001 | 4.892050643 | 41.35243089 | -3.0795  | 0.010208 |
| 423112 | 606.860484  | 1168.709318 | -0.94548 | 0.034567 |
| 423113 | 794.021976  | 1335.186957 | -0.74979 | 0.015331 |
| 423316 | 2709.510647 | 5950.277604 | -1.1349  | 0.002178 |
| 423401 | 86.05236548 | 182.480695  | -1.0845  | 0.001519 |
| 423409 | 96.34002618 | 184.1767888 | -0.93488 | 0.022743 |
| 423414 | 699.952388  | 1434.841124 | -1.0356  | 0.00038  |
| 423463 | 18540.39453 | 34595.31802 | -0.8999  | 0.001375 |
| 423494 | 432.2885807 | 681.9331345 | -0.65764 | 0.048438 |
| 423504 | 1045.919503 | 2869.888919 | -1.4562  | 5.45E-06 |
| 423595 | 685.4591243 | 1070.504061 | -0.64315 | 0.027884 |
| 423705 | 1257.230394 | 1910.239336 | -0.6035  | 0.037145 |
| 423771 | 128.1281184 | 337.6314763 | -1.3979  | 0.042137 |
| 423802 | 22.81769185 | 56.32360506 | -1.3036  | 0.003725 |
| 423816 | 464.1946363 | 741.4891019 | -0.6757  | 0.020548 |
| 423921 | 11.59061151 | 29.20210788 | -1.3331  | 0.019439 |
| 424046 | 658.6762696 | 1448.186792 | -1.1366  | 0.000643 |

---

|        |             |             |          |          |
|--------|-------------|-------------|----------|----------|
| 424117 | 5.851588825 | 30.53664308 | -2.3836  | 0.000171 |
| 424118 | 461.4259396 | 883.8552258 | -0.93771 | 0.001549 |
| 424250 | 526.2151661 | 947.1161024 | -0.84789 | 0.013064 |
| 424282 | 50.3566841  | 114.543918  | -1.1856  | 0.001497 |
| 424293 | 1476.304706 | 2304.333174 | -0.64236 | 0.032881 |
| 424546 | 81.94166442 | 142.9064457 | -0.8024  | 0.021937 |
| 424552 | 33.56375154 | 61.67106585 | -0.87769 | 0.040582 |
| 424572 | 376.045468  | 564.3427447 | -0.58566 | 0.045065 |
| 424675 | 261.9587535 | 897.9941396 | -1.7774  | 3.71E-09 |
| 424751 | 81.64478218 | 163.0233559 | -0.99765 | 0.039107 |
| 424882 | 692.0794286 | 1150.535094 | -0.7333  | 0.021251 |
| 425353 | 163.0965256 | 252.0266198 | -0.62785 | 0.047452 |
| 425791 | 61.62940915 | 143.2239323 | -1.2166  | 0.014495 |
| 426054 | 270.7697598 | 966.8912322 | -1.8363  | 0.04494  |
| 426071 | 427.5792049 | 811.6545979 | -0.92467 | 0.002113 |
| 426846 | 32.7135565  | 88.88118619 | -1.442   | 0.0054   |
| 426878 | 755.8499626 | 1137.67565  | -0.58992 | 0.042249 |
| 426943 | 11.48920291 | 28.51925644 | -1.3117  | 0.023417 |
| 427107 | 776.9223586 | 1298.681827 | -0.74121 | 0.043596 |
| 427303 | 206.4784642 | 351.2173758 | -0.76637 | 0.033803 |
| 427401 | 90.28087451 | 151.020287  | -0.74225 | 0.031531 |
| 427450 | 202.4919711 | 310.3302288 | -0.61594 | 0.048582 |



---

|        |             |             |          |          |
|--------|-------------|-------------|----------|----------|
| 427528 | 114.3135915 | 183.1267648 | -0.67985 | 0.041901 |
| 427538 | 16.55352645 | 43.47889011 | -1.3932  | 0.045518 |
| 427546 | 125.870329  | 212.3641896 | -0.7546  | 0.027501 |
| 427650 | 46.54296008 | 96.28367029 | -1.0487  | 0.012853 |
| 427768 | 58.20161427 | 106.2992566 | -0.869   | 0.019941 |
| 428140 | 74.81035963 | 432.2442156 | -2.5305  | 0.00687  |
| 428268 | 13.44666333 | 39.2128126  | -1.5441  | 0.002868 |
| 428310 | 154.6140984 | 424.866303  | -1.4583  | 0.033444 |
| 428321 | 280.9127902 | 427.7985576 | -0.60681 | 0.046888 |
| 428417 | 15.46955662 | 32.45738465 | -1.0691  | 0.045323 |
| 428435 | 42.52108222 | 107.09299   | -1.3326  | 0.002863 |
| 428505 | 3.712811608 | 23.67074429 | -2.6725  | 0.031561 |
| 428857 | 1.755847376 | 10.21531254 | -2.5405  | 0.016368 |
| 431302 | 5.060604359 | 16.83560374 | -1.7341  | 0.037251 |
| 768427 | 298.1821874 | 449.3834859 | -0.59175 | 0.044901 |
| 768861 | 64.83253384 | 135.6255601 | -1.0648  | 0.003135 |
| 769087 | 279.4026795 | 2184.005473 | -2.9666  | 0.01739  |
| 769097 | 1776.115501 | 3369.753967 | -0.92392 | 0.005563 |
| 769132 | 190.4220615 | 576.8111427 | -1.5989  | 0.009871 |
| 769528 | 303.6794638 | 847.3084187 | -1.4803  | 0.001226 |
| 771284 | 42.87728173 | 100.6251446 | -1.2307  | 0.034387 |
| 771419 | 78.88617212 | 140.1786561 | -0.82942 | 0.020565 |

---

|            |             |             |          |          |
|------------|-------------|-------------|----------|----------|
| 771494     | 20.81168221 | 42.1085268  | -1.0167  | 0.036837 |
| 771806     | 13704.58266 | 20908.90409 | -0.60946 | 0.029982 |
| 771985     | 14.21323099 | 71.19642574 | -2.3246  | 0.000768 |
| 772114     | 1195.509864 | 1864.342747 | -0.64104 | 0.022982 |
| Novel00022 | 5.420014966 | 17.90363799 | -1.7239  | 0.033114 |
| Novel00030 | 0.351169475 | 15.9951348  | -5.5093  | 0.00955  |
| Novel00138 | 225.7748146 | 374.546066  | -0.73026 | 0.033026 |
| Novel00150 | 1.020945285 | 8.570869507 | -3.0695  | 0.014769 |
| Novel00151 | 757.7286995 | 1599.403765 | -1.0778  | 0.001061 |
| Novel00167 | 1.025065851 | 12.45243093 | -3.6026  | 0.001172 |
| Novel00201 | 688.741005  | 1634.238554 | -1.2466  | 0.007723 |
| Novel00216 | 2.376979168 | 10.82824899 | -2.1876  | 0.027667 |
| Novel00260 | 3.850502528 | 59.61559781 | -3.9526  | 2.92E-07 |
| Novel00291 | 28.74587108 | 57.00889811 | -0.98783 | 0.046966 |
| Novel00292 | 55.06329738 | 104.2034891 | -0.92024 | 0.024615 |
| Novel00318 | 14.93577138 | 279.6014038 | -4.2265  | 2.10E-23 |
| Novel00322 | 3.099519561 | 15.17803446 | -2.2919  | 0.00722  |

---

*Table S5. Gene ontology enrichment terms of biological\_process category*

|       | GO_accession | Description                                            | p Value | DEG<br>number |
|-------|--------------|--------------------------------------------------------|---------|---------------|
| up-55 | GO:0006790   | sulfur compound metabolic process                      | 0.0013  | 5             |
|       | GO:0000045   | autophagosome assembly                                 | 0.0027  | 2             |
|       | GO:0016236   | macroautophagy                                         | 0.0027  | 2             |
|       | GO:0044699   | single-organism process                                | 0.0062  | 98            |
|       | GO:0007033   | vacuole organization                                   | 0.0076  | 2             |
|       | GO:0044272   | sulfur compound biosynthetic process                   | 0.0084  | 3             |
|       | GO:0032011   | ARF protein signal transduction                        | 0.0100  | 2             |
|       | GO:0032012   | regulation of ARF protein signal transduction          | 0.0100  | 2             |
|       | GO:0009084   | glutamine family amino acid biosynthetic<br>process    | 0.0101  | 2             |
|       | GO:0010876   | lipid localization                                     | 0.0116  | 5             |
|       | GO:0008152   | metabolic process                                      | 0.0133  | 100           |
|       | GO:0016055   | Wnt signaling pathway                                  | 0.0160  | 4             |
|       | GO:0072528   | pyrimidine-containing compound biosynthetic<br>process | 0.0160  | 3             |
|       | GO:0009267   | cellular response to starvation                        | 0.0188  | 2             |
|       | GO:0031667   | response to nutrient levels                            | 0.0188  | 2             |
|       | GO:0031669   | cellular response to nutrient levels                   | 0.0188  | 2             |

|            |                                               |        |    |
|------------|-----------------------------------------------|--------|----|
| GO:0042594 | response to starvation                        | 0.0188 | 2  |
| GO:0006820 | anion transport                               | 0.0200 | 6  |
| GO:0009991 | response to extracellular stimulus            | 0.0220 | 3  |
| GO:0031668 | cellular response to extracellular stimulus   | 0.0220 | 3  |
| GO:0071496 | cellular response to external stimulus        | 0.0220 | 3  |
| GO:0000077 | DNA damage checkpoint                         | 0.0220 | 2  |
| GO:0031570 | DNA integrity checkpoint                      | 0.0220 | 2  |
| GO:0032990 | cell part morphogenesis                       | 0.0266 | 3  |
| GO:0048858 | cell projection morphogenesis                 | 0.0266 | 3  |
| GO:0033993 | response to lipid                             | 0.0270 | 3  |
| GO:0043401 | steroid hormone mediated signaling pathway    | 0.0270 | 3  |
| GO:0048545 | response to steroid hormone                   | 0.0270 | 3  |
| GO:0071383 | cellular response to steroid hormone stimulus | 0.0270 | 3  |
| GO:0071396 | cellular response to lipid                    | 0.0270 | 3  |
| GO:0071407 | cellular response to organic cyclic compound  | 0.0270 | 3  |
| GO:0055114 | oxidation-reduction process                   | 0.0300 | 20 |
| GO:0006869 | lipid transport                               | 0.0301 | 4  |
| GO:0030203 | glycosaminoglycan metabolic process           | 0.0313 | 2  |
| GO:0009165 | nucleotide biosynthetic process               | 0.0321 | 6  |
| GO:1901293 | nucleoside phosphate biosynthetic process     | 0.0321 | 6  |

|            |                                                     |        |    |
|------------|-----------------------------------------------------|--------|----|
| GO:0072527 | pyrimidine-containing compound metabolic<br>process | 0.0336 | 3  |
| GO:0031532 | actin cytoskeleton reorganization                   | 0.0337 | 1  |
| GO:0090630 | activation of GTPase activity                       | 0.0337 | 1  |
| GO:0006817 | phosphate ion transport                             | 0.0362 | 2  |
| GO:0009755 | hormone-mediated signaling pathway                  | 0.0378 | 3  |
| GO:0032870 | cellular response to hormone stimulus               | 0.0378 | 3  |
| GO:0014070 | response to organic cyclic compound                 | 0.0389 | 3  |
| GO:0031122 | cytoplasmic microtubule organization                | 0.0390 | 1  |
| GO:0035058 | nonmotile primary cilium assembly                   | 0.0390 | 1  |
| GO:0006164 | purine nucleotide biosynthetic process              | 0.0400 | 5  |
| GO:0090407 | organophosphate biosynthetic process                | 0.0405 | 8  |
| GO:0044711 | single-organism biosynthetic process                | 0.0419 | 15 |
| GO:0007166 | cell surface receptor signaling pathway             | 0.0428 | 6  |
| GO:0006027 | glycosaminoglycan catabolic process                 | 0.0438 | 1  |
| GO:0009253 | peptidoglycan catabolic process                     | 0.0438 | 1  |
| GO:0071495 | cellular response to endogenous stimulus            | 0.0451 | 3  |
| GO:0018144 | RNA-protein covalent cross-linking                  | 0.0451 | 1  |
| GO:0072522 | purine-containing compound biosynthetic<br>process  | 0.0477 | 5  |
| GO:0043087 | regulation of GTPase activity                       | 0.0489 | 2  |

|              |            |                                                      |        |    |
|--------------|------------|------------------------------------------------------|--------|----|
| <b>down-</b> | GO:0009056 | catabolic process                                    | 0.0009 | 18 |
| <b>120</b>   |            |                                                      |        |    |
|              | GO:0006914 | autophagy                                            | 0.0012 | 9  |
|              | GO:0048869 | cellular developmental process                       | 0.0012 | 10 |
|              | GO:0044248 | cellular catabolic process                           | 0.0014 | 15 |
|              | GO:0009653 | anatomical structure morphogenesis                   | 0.0018 | 9  |
|              | GO:0009065 | glutamine family amino acid catabolic<br>process     | 0.0029 | 2  |
|              | GO:0007127 | meiosis I                                            | 0.0033 | 3  |
|              | GO:0007049 | cell cycle                                           | 0.0040 | 13 |
|              | GO:0032446 | protein modification by small protein<br>conjugation | 0.0061 | 5  |
|              | GO:0007126 | meiotic nuclear division                             | 0.0062 | 3  |
|              | GO:1903046 | meiotic cell cycle process                           | 0.0062 | 3  |
|              | GO:0071822 | protein complex subunit organization                 | 0.0070 | 13 |
|              | GO:0048856 | anatomical structure development                     | 0.0079 | 10 |
|              | GO:0051321 | meiotic cell cycle                                   | 0.0086 | 3  |
|              | GO:0006461 | protein complex assembly                             | 0.0095 | 12 |
|              | GO:0070271 | protein complex biogenesis                           | 0.0100 | 12 |

|            |                                                                       |        |    |
|------------|-----------------------------------------------------------------------|--------|----|
| GO:0044767 | single-organism developmental process                                 | 0.0103 | 14 |
| GO:0009052 | pentose-phosphate shunt, non-oxidative<br>branch                      | 0.0104 | 1  |
| GO:0044085 | cellular component biogenesis                                         | 0.0112 | 17 |
| GO:0006771 | riboflavin metabolic process                                          | 0.0118 | 2  |
| GO:0009231 | riboflavin biosynthetic process                                       | 0.0118 | 2  |
| GO:0042726 | flavin-containing compound metabolic<br>process                       | 0.0118 | 2  |
| GO:0042727 | flavin-containing compound biosynthetic<br>process                    | 0.0118 | 2  |
| GO:0000280 | nuclear division                                                      | 0.0129 | 5  |
| GO:0008277 | regulation of G-protein coupled receptor<br>protein signaling pathway | 0.0132 | 2  |
| GO:0022607 | cellular component assembly                                           | 0.0137 | 15 |
| GO:0065003 | macromolecular complex assembly                                       | 0.0149 | 12 |
| GO:0022402 | cell cycle process                                                    | 0.0152 | 9  |
| GO:0032502 | developmental process                                                 | 0.0156 | 14 |
| GO:0007131 | reciprocal meiotic recombination                                      | 0.0160 | 2  |
| GO:0035825 | reciprocal DNA recombination                                          | 0.0160 | 2  |
| GO:0030154 | cell differentiation                                                  | 0.0169 | 7  |
| GO:0009628 | response to abiotic stimulus                                          | 0.0176 | 2  |

|            |                                               |        |   |
|------------|-----------------------------------------------|--------|---|
| GO:0048285 | organelle fission                             | 0.0194 | 5 |
| GO:0006098 | pentose-phosphate shunt                       | 0.0201 | 1 |
| GO:0000075 | cell cycle checkpoint                         | 0.0217 | 3 |
| GO:0043623 | cellular protein complex assembly             | 0.0224 | 8 |
| GO:1901606 | alpha-amino acid catabolic process            | 0.0226 | 2 |
| GO:0006113 | fermentation                                  | 0.0230 | 1 |
| GO:0019665 | anaerobic amino acid catabolic process        | 0.0230 | 1 |
| GO:0019670 | anaerobic glutamate catabolic process         | 0.0230 | 1 |
| GO:0006457 | protein folding                               | 0.0232 | 4 |
| GO:0051156 | glucose 6-phosphate metabolic process         | 0.0234 | 1 |
| GO:0010639 | negative regulation of organelle organization | 0.0238 | 3 |
| GO:0009411 | response to UV                                | 0.0241 | 1 |
| GO:0000902 | cell morphogenesis                            | 0.0242 | 4 |
| GO:0032989 | cellular component morphogenesis              | 0.0242 | 4 |
| GO:0000003 | reproduction                                  | 0.0244 | 8 |
| GO:0009110 | vitamin biosynthetic process                  | 0.0248 | 3 |
| GO:0042364 | water-soluble vitamin biosynthetic process    | 0.0248 | 3 |
| GO:0045116 | protein neddylation                           | 0.0249 | 1 |
| GO:0016567 | protein ubiquitination                        | 0.0268 | 4 |
| GO:0006766 | vitamin metabolic process                     | 0.0272 | 3 |
| GO:0006767 | water-soluble vitamin metabolic process       | 0.0272 | 3 |



|            |                                                              |        |    |
|------------|--------------------------------------------------------------|--------|----|
| GO:0006538 | glutamate catabolic process                                  | 0.0294 | 1  |
| GO:0043649 | dicarboxylic acid catabolic process                          | 0.0294 | 1  |
| GO:0070925 | organelle assembly                                           | 0.0300 | 4  |
| GO:0098813 | nuclear chromosome segregation                               | 0.0313 | 4  |
| GO:0051129 | negative regulation of cellular component organization       | 0.0329 | 3  |
| GO:0007128 | meiotic prophase I                                           | 0.0330 | 1  |
| GO:0051324 | prophase                                                     | 0.0330 | 1  |
| GO:0098762 | meiotic cell cycle phase                                     | 0.0330 | 1  |
| GO:0098764 | meiosis I cell cycle phase                                   | 0.0330 | 1  |
| GO:0043933 | macromolecular complex subunit organization                  | 0.0335 | 13 |
| GO:0070647 | protein modification by small protein conjugation or removal | 0.0376 | 5  |
| GO:0043093 | FtsZ-dependent cytokinesis                                   | 0.0388 | 3  |
| GO:0006824 | cobalt ion transport                                         | 0.0389 | 1  |
| GO:0009832 | plant-type cell wall biogenesis                              | 0.0394 | 1  |
| GO:0010215 | cellulose microfibril organization                           | 0.0394 | 1  |
| GO:0070726 | cell wall assembly                                           | 0.0394 | 1  |
| GO:0071668 | plant-type cell wall assembly                                | 0.0394 | 1  |
| GO:0032505 | reproduction of a single-celled organism                     | 0.0402 | 3  |
| GO:0000917 | barrier septum assembly                                      | 0.0407 | 3  |

|            |                                                                                     |        |   |
|------------|-------------------------------------------------------------------------------------|--------|---|
| GO:0032506 | cytokinetic process                                                                 | 0.0407 | 3 |
| GO:0090529 | cell septum assembly                                                                | 0.0407 | 3 |
| GO:1902410 | mitotic cytokinetic process                                                         | 0.0407 | 3 |
| GO:0007094 | mitotic spindle assembly checkpoint                                                 | 0.0419 | 2 |
| GO:0009895 | negative regulation of catabolic process                                            | 0.0419 | 2 |
| GO:0031330 | negative regulation of cellular catabolic<br>process                                | 0.0419 | 2 |
| GO:0031396 | regulation of protein ubiquitination                                                | 0.0419 | 2 |
| GO:0031397 | negative regulation of protein ubiquitination                                       | 0.0419 | 2 |
| GO:0031577 | spindle checkpoint                                                                  | 0.0419 | 2 |
| GO:0032435 | negative regulation of proteasomal<br>ubiquitin-dependent protein catabolic process | 0.0419 | 2 |
| GO:0033046 | negative regulation of sister chromatid<br>segregation                              | 0.0419 | 2 |
| GO:0033048 | negative regulation of mitotic sister chromatid<br>segregation                      | 0.0419 | 2 |
| GO:0042177 | negative regulation of protein catabolic<br>process                                 | 0.0419 | 2 |
| GO:0045839 | negative regulation of mitotic nuclear division                                     | 0.0419 | 2 |
| GO:0045841 | negative regulation of mitotic<br>metaphase/anaphase transition                     | 0.0419 | 2 |

|            |                                                                                         |        |   |
|------------|-----------------------------------------------------------------------------------------|--------|---|
| GO:0051340 | regulation of ligase activity                                                           | 0.0419 | 2 |
| GO:0051352 | negative regulation of ligase activity                                                  | 0.0419 | 2 |
| GO:0051436 | negative regulation of ubiquitin-protein ligase activity involved in mitotic cell cycle | 0.0419 | 2 |
| GO:0051438 | regulation of ubiquitin-protein transferase activity                                    | 0.0419 | 2 |
| GO:0051439 | regulation of ubiquitin-protein ligase activity involved in mitotic cell cycle          | 0.0419 | 2 |
| GO:0051444 | negative regulation of ubiquitin-protein transferase activity                           | 0.0419 | 2 |
| GO:0051985 | negative regulation of chromosome segregation                                           | 0.0419 | 2 |
| GO:0071173 | spindle assembly checkpoint                                                             | 0.0419 | 2 |
| GO:0071174 | mitotic spindle checkpoint                                                              | 0.0419 | 2 |
| GO:1901799 | negative regulation of proteasomal protein catabolic process                            | 0.0419 | 2 |
| GO:1902100 | negative regulation of metaphase/anaphase transition of cell cycle                      | 0.0419 | 2 |
| GO:1903051 | negative regulation of proteolysis involved in cellular protein catabolic process       | 0.0419 | 2 |

|            |                                                                                        |        |    |
|------------|----------------------------------------------------------------------------------------|--------|----|
| GO:1903320 | regulation of protein modification by small<br>protein conjugation or removal          | 0.0419 | 2  |
| GO:1903321 | negative regulation of protein modification by<br>small protein conjugation or removal | 0.0419 | 2  |
| GO:1903363 | negative regulation of cellular protein<br>catabolic process                           | 0.0419 | 2  |
| GO:1904666 | regulation of ubiquitin protein ligase activity                                        | 0.0419 | 2  |
| GO:1904667 | negative regulation of ubiquitin protein ligase<br>activity                            | 0.0419 | 2  |
| GO:2000816 | negative regulation of mitotic sister chromatid<br>separation                          | 0.0419 | 2  |
| GO:2001251 | negative regulation of chromosome<br>organization                                      | 0.0419 | 2  |
| GO:0030474 | spindle pole body duplication                                                          | 0.0423 | 2  |
| GO:0051300 | spindle pole body organization                                                         | 0.0423 | 2  |
| GO:0044712 | single-organism catabolic process                                                      | 0.0436 | 6  |
| GO:0006836 | neurotransmitter transport                                                             | 0.0441 | 2  |
| GO:0007093 | mitotic cell cycle checkpoint                                                          | 0.0448 | 2  |
| GO:1901575 | organic substance catabolic process                                                    | 0.0448 | 10 |
| GO:0051784 | negative regulation of nuclear division                                                | 0.0453 | 2  |
| GO:0009063 | cellular amino acid catabolic process                                                  | 0.0458 | 2  |
| GO:0000278 | mitotic cell cycle                                                                     | 0.0474 | 5  |

|            |                                                               |        |   |
|------------|---------------------------------------------------------------|--------|---|
| GO:1903047 | mitotic cell cycle process                                    | 0.0474 | 5 |
| GO:1901988 | negative regulation of cell cycle phase<br>transition         | 0.0480 | 2 |
| GO:1901991 | negative regulation of mitotic cell cycle phase<br>transition | 0.0480 | 2 |
| GO:0051301 | cell division                                                 | 0.0484 | 5 |

---

**Table S6. Gene ontology enrichment terms of molecular\_function category**

|       | GO_accession | Description                                                     | p Value | DEG number |
|-------|--------------|-----------------------------------------------------------------|---------|------------|
| up-46 | GO:0019825   | oxygen binding                                                  | 0.0001  | 3          |
|       | GO:0046983   | protein dimerization activity                                   | 0.0050  | 9          |
|       | GO:0000702   | oxidized base lesion DNA<br>N-glycosylase activity              | 0.0076  | 1          |
|       | GO:0008534   | oxidized purine nucleobase lesion<br>DNA N-glycosylase activity | 0.0076  | 1          |
|       | GO:0005086   | ARF guanyl-nucleotide exchange<br>factor activity               | 0.0100  | 2          |
|       | GO:0008762   | UDP-N-acetylmuramate<br>dehydrogenase activity                  | 0.0111  | 1          |
|       | GO:0020037   | heme binding                                                    | 0.0121  | 5          |
|       | GO:0003995   | acyl-CoA dehydrogenase activity                                 | 0.0146  | 2          |
|       | GO:0005315   | inorganic phosphate transmembrane<br>transporter activity       | 0.0153  | 2          |
|       | GO:0046906   | tetrapyrrole binding                                            | 0.0172  | 5          |
|       | GO:0004714   | transmembrane receptor protein<br>tyrosine kinase activity      | 0.0188  | 2          |
|       | GO:0016627   | oxidoreductase activity, acting on the<br>CH-CH group of donors | 0.0189  | 4          |

---

|            |                                                                                                          |        |   |
|------------|----------------------------------------------------------------------------------------------------------|--------|---|
| GO:0050797 | thymidylate synthase (FAD) activity                                                                      | 0.0199 | 1 |
| GO:0004643 | phosphoribosylaminoimidazolecarboxamide formyltransferase activity                                       | 0.0214 | 1 |
| GO:0000977 | RNA polymerase II regulatory region sequence-specific DNA binding                                        | 0.0220 | 1 |
| GO:0000978 | RNA polymerase II core promoter proximal region sequence-specific DNA binding                            | 0.0220 | 1 |
| GO:0000982 | transcription factor activity, RNA polymerase II core promoter proximal region sequence-specific binding | 0.0220 | 1 |
| GO:0000987 | core promoter proximal region sequence-specific DNA binding                                              | 0.0220 | 1 |
| GO:0001012 | RNA polymerase II regulatory region DNA binding                                                          | 0.0220 | 1 |
| GO:0001159 | core promoter proximal region DNA binding                                                                | 0.0220 | 1 |
| GO:0030284 | estrogen receptor activity                                                                               | 0.0239 | 1 |
| GO:0004719 | protein-L-isoaspartate (D-aspartate) O-methyltransferase activity                                        | 0.0254 | 2 |
| GO:0008173 | RNA methyltransferase activity                                                                           | 0.0272 | 3 |
| GO:0009020 | tRNA                                                                                                     | 0.0299 | 1 |

---

|            |                                                                                       |        |   |
|------------|---------------------------------------------------------------------------------------|--------|---|
|            | (guanosine-2'-O-)-methyltransferase activity                                          |        |   |
| GO:0008855 | exodeoxyribonuclease VII activity                                                     | 0.0316 | 4 |
| GO:0004019 | adenylosuccinate synthase activity                                                    | 0.0324 | 1 |
| GO:0004529 | exodeoxyribonuclease activity                                                         | 0.0338 | 4 |
| GO:0016895 | exodeoxyribonuclease activity, producing 5'-phosphomonoesters                         | 0.0338 | 4 |
| GO:1901677 | phosphate transmembrane transporter activity                                          | 0.0349 | 2 |
| GO:0004308 | exo-alpha-sialidase activity                                                          | 0.0349 | 1 |
| GO:0016997 | alpha-sialidase activity                                                              | 0.0349 | 1 |
| GO:0016798 | hydrolase activity, acting on glycosyl bonds                                          | 0.0377 | 6 |
| GO:0004806 | triglyceride lipase activity                                                          | 0.0390 | 1 |
| GO:0016616 | oxidoreductase activity, acting on the CH-OH group of donors, NAD or NADP as acceptor | 0.0413 | 4 |
| GO:0017046 | peptide hormone binding                                                               | 0.0413 | 1 |
| GO:0042562 | hormone binding                                                                       | 0.0413 | 1 |
| GO:0051424 | corticotropin-releasing hormone binding                                               | 0.0413 | 1 |
| GO:0010340 | carboxyl-O-methyltransferase activity                                                 | 0.0420 | 2 |



---

|         |            |                                               |        |    |
|---------|------------|-----------------------------------------------|--------|----|
|         | GO:0051998 | protein carboxyl O-methyltransferase activity | 0.0420 | 2  |
|         | GO:0004373 | glycogen (starch) synthase activity           | 0.0429 | 1  |
|         | GO:0005085 | guanyl-nucleotide exchange factor activity    | 0.0432 | 4  |
|         | GO:0004013 | adenosylhomocysteinase activity               | 0.0435 | 1  |
|         | GO:0016801 | hydrolase activity, acting on ether bonds     | 0.0435 | 1  |
|         | GO:0016802 | trialkylsulfonium hydrolase activity          | 0.0435 | 1  |
|         | GO:0008198 | ferrous iron binding                          | 0.0456 | 1  |
|         | GO:0003937 | IMP cyclohydrolase activity                   | 0.0498 | 1  |
| down-30 | GO:0000149 | SNARE binding                                 | 0.0006 | 3  |
|         | GO:0019905 | syntaxin binding                              | 0.0006 | 3  |
|         | GO:0043565 | sequence-specific DNA binding                 | 0.0009 | 14 |
|         | GO:0003919 | FMN adenylyltransferase activity              | 0.0014 | 2  |
|         | GO:0016866 | intramolecular transferase activity           | 0.0044 | 3  |
|         | GO:0008565 | protein transporter activity                  | 0.0045 | 5  |
|         | GO:0004659 | prenyltransferase activity                    | 0.0061 | 3  |
|         | GO:0004751 | ribose-5-phosphate isomerase activity         | 0.0104 | 1  |
|         | GO:0008791 | arginine N-succinyltransferase                | 0.0145 | 1  |

---

|            |                                                                             |        |   |
|------------|-----------------------------------------------------------------------------|--------|---|
|            | activity                                                                    |        |   |
| GO:0034069 | aminoglycoside N-acetyltransferase activity                                 | 0.0216 | 1 |
| GO:0046353 | aminoglycoside 3-N-acetyltransferase activity                               | 0.0216 | 1 |
| GO:0050097 | methylaspartate mutase activity                                             | 0.0230 | 1 |
| GO:0004519 | endonuclease activity                                                       | 0.0260 | 6 |
| GO:0030145 | manganese ion binding                                                       | 0.0309 | 2 |
| GO:0015035 | protein disulfide oxidoreductase activity                                   | 0.0312 | 2 |
| GO:0015036 | disulfide oxidoreductase activity                                           | 0.0312 | 2 |
| GO:0004864 | protein phosphatase inhibitor activity                                      | 0.0352 | 1 |
| GO:0019212 | phosphatase inhibitor activity                                              | 0.0352 | 1 |
| GO:0004161 | dimethylallyltranstransferase activity                                      | 0.0352 | 1 |
|            | tRNA                                                                        |        |   |
| GO:0009020 | (guanosine-2'-O-)-methyltransferase activity                                | 0.0355 | 1 |
| GO:0015087 | cobalt ion transmembrane transporter activity                               | 0.0389 | 1 |
| GO:0005138 | interleukin-6 receptor binding                                              | 0.0403 | 1 |
| GO:0016765 | transferase activity, transferring alkyl or aryl (other than methyl) groups | 0.0404 | 3 |

---

|            |                                                                 |        |    |
|------------|-----------------------------------------------------------------|--------|----|
| GO:0000014 | single-stranded DNA<br>endodeoxyribonuclease activity           | 0.0406 | 1  |
| GO:0001071 | nucleic acid binding transcription<br>factor activity           | 0.0410 | 14 |
| GO:0003700 | transcription factor activity,<br>sequence-specific DNA binding | 0.0410 | 14 |
| GO:0070566 | adenylyltransferase activity                                    | 0.0448 | 2  |
| GO:0004800 | thyroxine 5'-deiodinase activity                                | 0.0452 | 1  |
| GO:0004683 | calmodulin-dependent protein kinase<br>activity                 | 0.0468 | 1  |
| GO:0016853 | isomerase activity                                              | 0.0487 | 5  |

---

**Table S7.** Gene ontology enrichment terms of cellular\_component category

|         | <b>GO_accession</b> | <b>Description</b>                               | <b>p Value</b> | <b>DEG number</b> |
|---------|---------------------|--------------------------------------------------|----------------|-------------------|
| up-8    | GO:0030896          | checkpoint clamp complex                         | 0.0051         | 2                 |
|         | GO:0005890          | sodium:potassium-exchanging ATPase complex       | 0.0066         | 2                 |
|         | GO:0090533          | cation-transporting ATPase complex               | 0.0066         | 2                 |
|         | GO:0098533          | ATPase dependent transmembrane transport complex | 0.0104         | 2                 |
|         | GO:1904564          | Nbp35-Cfd1 ATPase complex                        | 0.0104         | 2                 |
|         | GO:0031012          | extracellular matrix                             | 0.0183         | 6                 |
|         | GO:0009539          | photosystem II reaction center                   | 0.0217         | 3                 |
|         | GO:0097546          | ciliary base                                     | 0.0390         | 1                 |
| down-14 | GO:0044430          | cytoskeletal part                                | 0.0065         | 13                |
|         | GO:0015629          | actin cytoskeleton                               | 0.0071         | 5                 |
|         | GO:0005856          | cytoskeleton                                     | 0.0127         | 13                |
|         | GO:0070876          | SOSS complex                                     | 0.0195         | 1                 |
|         | GO:0031225          | anchored component of membrane                   | 0.0224         | 2                 |
|         | GO:0005634          | nucleus                                          | 0.0295         | 31                |
|         | GO:0005730          | nucleolus                                        | 0.0316         | 2                 |
|         | GO:0005815          | microtubule organizing center                    | 0.0330         | 3                 |
|         | GO:0043232          | intracellular non-membrane-bounded organelle     | 0.0337         | 21                |
|         | GO:0043190          | ATP-binding cassette (ABC) transporter complex   | 0.0365         | 1                 |

---

|            |                                   |        |    |
|------------|-----------------------------------|--------|----|
| GO:0019028 | viral capsid                      | 0.0373 | 9  |
| GO:0043228 | non-membrane-bounded<br>organelle | 0.0418 | 21 |
| GO:0016459 | myosin complex                    | 0.0424 | 3  |
| GO:0019012 | virion                            | 0.0495 | 13 |

---
